# Supplementary material for: Exploring perspectives of knowledge users about reporting on health equity in observational studies: A qualitative study informing the development of the STROBE-Equity reporting guideline
Source: Research Square preprint supplement (doi:10.21203/rs.3.rs-7216792/v1), 2025-09-11
Supplement: Supplementary file 1 [file 66918dd27244b117a53840cc.docx]

| **Section and Topic** | **Page/line no(s)** |
| --- | --- |
| **Title and Abstract** | |
| **Title** - Concise description of the nature and topic of the study identifying the study as qualitative or indicating the approach (e.g., ethnography, grounded theory) or data collection methods (e.g., interview, focus group) is recommended | Page 1, lines 1-3 |
| **Abstract** - Summary of key elements of the study using the abstract format of the intended publication; typically includes background, purpose, methods, results, and conclusions | Page 3-4, lines 50-84 |
| **Introduction** | |
| **Problem formulation** - Description and significance of the problem/phenomenon studied; review of relevant theory and empirical work; problem statement | Page 5-7, lines 95-148 |
| **Purpose or research question** - Purpose of the study and specific objectives or questions | Page 7, lines 149-157 |
| **Methods** | |
| **Qualitative approach and research paradigm** - Qualitative approach (e.g., ethnography, grounded theory, case study, phenomenology, narrative research) and guiding theory if appropriate; identifying the research paradigm (e.g., postpositivist, constructivist/ interpretivist) is also recommended; rationale** | Page 8, lines 174-181  Page 9, lines 190-197 |
| **Researcher characteristics and reflexivity** - Researchers’ characteristics that may influence the research, including personal attributes, qualifications/experience, relationship with participants, assumptions, and/or presuppositions; potential or actual interaction between researchers’ characteristics and the research questions, approach, methods, results, and/or transferability | Page 8, line 166-172  Page 10, lines 215-222 |
| **Context** - Setting/site and salient contextual factors; rationale** | Page 9, lines 208-210  Page 10, lines 224-225 |
| **Sampling strategy** - How and why research participants, documents, or events were selected; criteria for deciding when no further sampling was necessary (e.g., sampling saturation); rationale** | Page 9, lines 200-213  Page 12, lines 274-276 |
| **Ethical issues pertaining to human subjects** - Documentation of approval by an appropriate ethics review board and participant consent, or explanation for lack thereof; other confidentiality and data security issues | Page 7, lines 162-163 |
| **Data collection methods** - Types of data collected; details of data collection procedures including (as appropriate) start and stop dates of data collection and analysis, iterative process, triangulation of sources/methods, and modification of procedures in response to evolving study findings; rationale** | Page 8, lines 178-188  Page 10, lines 215-238  Page 11, lines 240-263 |
| **Data collection instruments and technologies** - Description of instruments (e.g., interview guides, questionnaires) and devices (e.g., audio recorders) used for data collection; if/how the instrument(s) changed over the course of the study | Page 8, lines 184-187  Page 10, lines 219-222  Page 10, lines 224-225  Page 11, lines 237-238  Page 11, lines 247-249 |
| **Units of study** - Number and relevant characteristics of participants, documents, or events included in the study; level of participation (could be reported in results) | Page 12, lines 274-288 |
| **Data processing** - Methods for processing data prior to and during analysis, including transcription, data entry, data management and security, verification of data integrity, data coding, and anonymization/de-identification of excerpts | Page 11, lines 240-246  Page 11, lines 247-252 |
| **Data analysis** - Process by which inferences, themes, etc., were identified and developed, including the researchers involved in data analysis; usually references a specific paradigm or approach; rationale** | Page 8, lines 178-184  Page 9, lines 190-197  Page 11, lines 240-246  Page 11, lines 250-252  Page 11, lines 253-259  Page 12, lines 259-263 |
| **Techniques to enhance trustworthiness** - Techniques to enhance trustworthiness and credibility of data analysis (e.g., member checking, audit trail, triangulation); rationale** | Page 11, lines 253-263 |
| **Results/findings** | |
| **Synthesis and interpretation** - Main findings (e.g., interpretations, inferences, and themes); might include development of a theory or model, or integration with prior research or theory | Page 13, lines 293-496 |
| **Links to empirical data** - Evidence (e.g., quotes, field notes, text excerpts, photographs) to substantiate analytic findings | Page 14, lines 310-317  Page 15, lines 321-325, 335-338  Page 16, lines 349-355  Page 17, lines 367-374, 385-389  Page 18, lines 390-394, 400-408  Page 19, lines 417-429, 434-435  Page 20, lines 436-438, 441-443, 447-450, 455-458  Page 21, lines 462-464, 475-484 |
| **Discussion** | |
| **Integration with prior work, implications, transferability, and contribution(s) to the field** - Short summary of main findings; explanation of how findings and conclusions connect to, support, elaborate on, or challenge conclusions of earlier scholarship; discussion of scope of application/generalizability; identification of unique contribution(s) to scholarship in a discipline or field | Page 22, lines 500-560 |
| **Limitations** - Trustworthiness and limitations of findings | Page 24, lines 542-543 |
| **Other** | |
| **Conflicts of interest** - Potential sources of influence or perceived influence on study conduct and conclusions; how these were managed | Page 26, lines 580-583 |
| **Funding** - Sources of funding and other support; role of funders in data collection, interpretation, and reporting | Page 8, line 164  Page 26, lines 584-585 |
| *The authors created the SRQR by searching the literature to identify guidelines, reporting standards, and critical appraisal criteria for qualitative research; reviewing the reference lists of retrieved sources; and contacting experts to gain feedback. The SRQR aims to improve the transparency of all aspects of qualitative research by providing clear standards for reporting qualitative research. | |
| **The rationale should briefly discuss the justification for choosing that theory, approach, method, or technique rather than other options available, the assumptions and limitations implicit in those choices, and how those choices influence study conclusions and transferability. As appropriate, the rationale for several items might be discussed together. | |

Reference: O’Brien BC, Harris IB, Beckman TJ, Reed DA, Cook DA. Standards for Reporting Qualitative Research: A Synthesis of Recommendations. Acad Med. 2014 Sep;89(9):1245–51.
