# Supplementary material for: Exploring perspectives of knowledge users about reporting on health equity in observational studies: A qualitative study informing the development of the STROBE-Equity reporting guideline
Source: Research Square preprint supplement (doi:10.21203/rs.3.rs-7216792/v1), 2025-09-11
Supplement: Supplementary file 2 [file 8430d2c2fcd120a80a0f5a7e.docx]

| **Section and Topic** | **Item** | **Reported on page number** |
| --- | --- | --- |
| Aim | Report the aim of the PPI in the study. | Aim described in Abstract (page 3 and 4) and Background section (Page 6: “*Improving knowledge translation through knowledge user engagement*” and page 7: “*Study aims and objectives*”) |
| Methods | Provide a clear description of the methods used for PPI in the study. | Methods section see page 8: “*Design*” and page 9: “*Setting and participants*” |
| Study results | Outcomes – report the results of PPI in the study, including both positive and negative outcomes. | Results section see page 12: “*Participant characteristics*” and page 13: “*Participant-derived themes: Descriptive insights on a STROBE-Equity extension*” |
| Discussion and conclusion | Outcomes – comment on the extent to which PPI influenced the study overall. Describe positive and negative effects. | Discussion section see page 22 and see page 24: “*Strengths and limitations*” |
| Reflections/critical perspective | Comment critically on the study, reflecting on the things that went well, and those that did not so others can learn from this experience. | Discussion section see page 24:“*Strengths and limitations*” and “*Future research*” |

PPI (Patient and public involvement)
